# Supplementary material
Source: PubMed Central journal article supplement (PMC11072023)

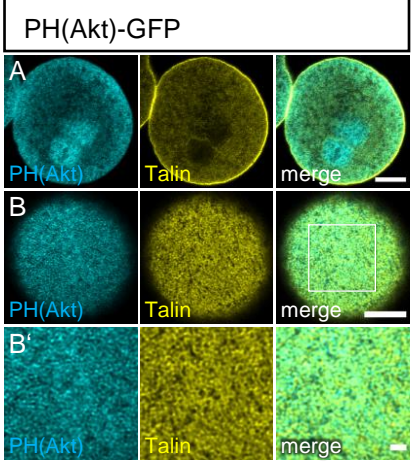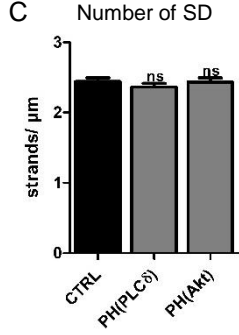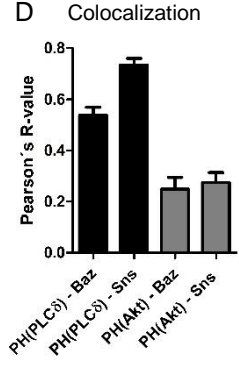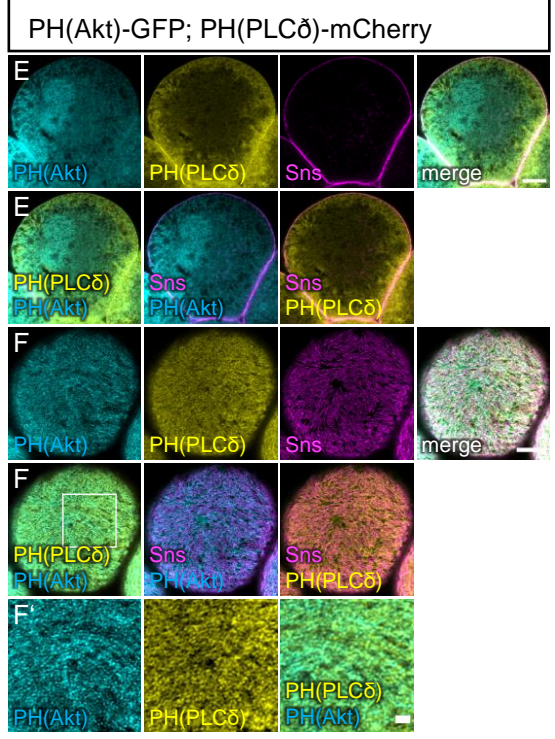

Supplement: 18_2022_4273_MOESM2_ESM.pdf [file 18_2022_4273_MOESM2_ESM.pdf]
