# Supplementary material
Source: PubMed Central journal article supplement (PMC11072023)

**Skdl-RNAi; PH(PLC $\delta$ )-mCherry**

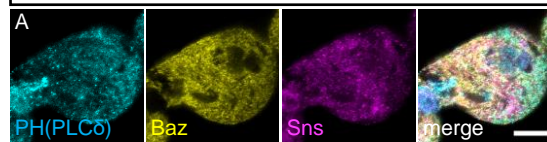

**CTRL**

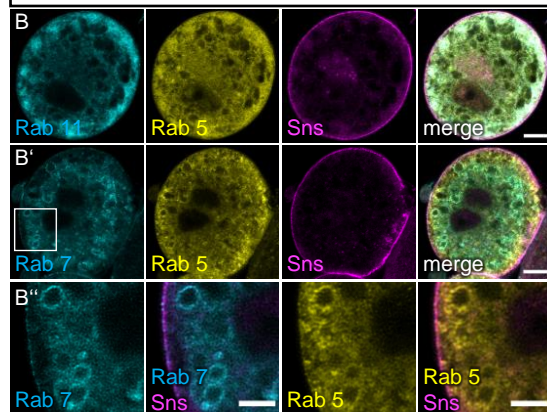

**Skdl-RNAi**

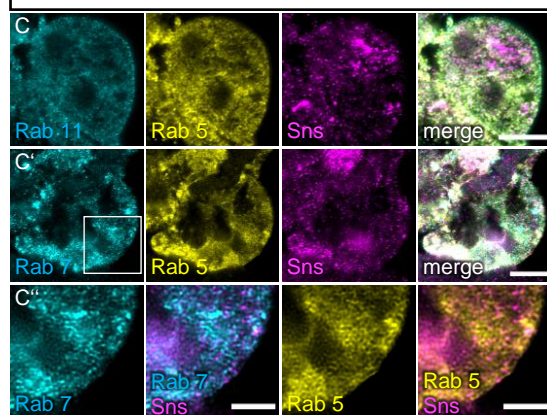

**Myc-Skdl**

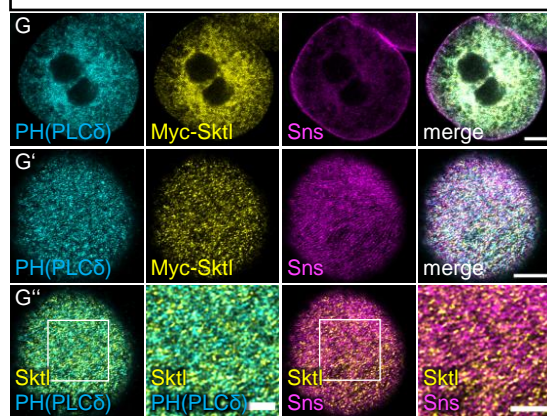

**UAS::Skdl; PH(PLC $\delta$ )-mCherry**

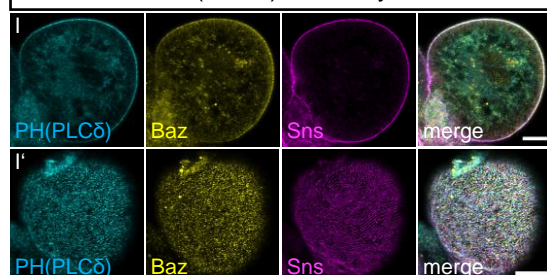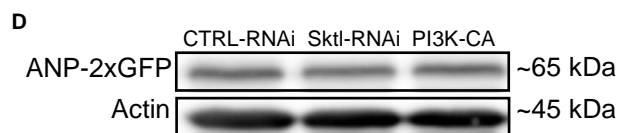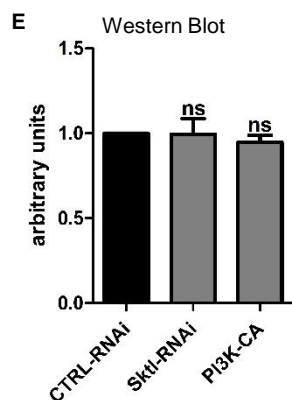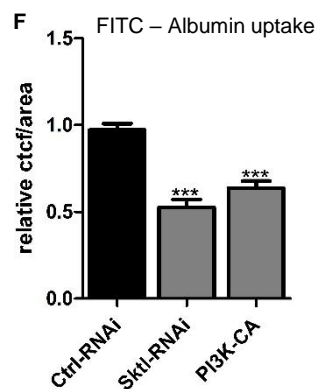

**UAS::Skdl**

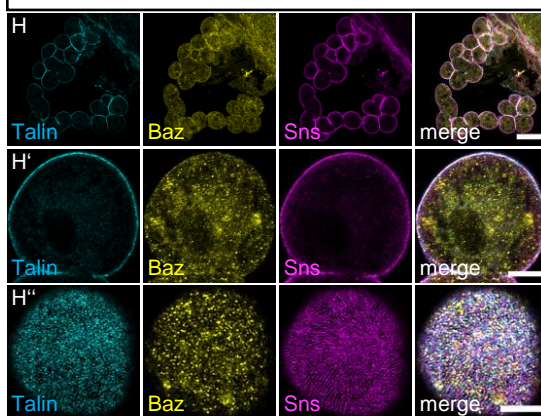

**Sec3-RNAi**

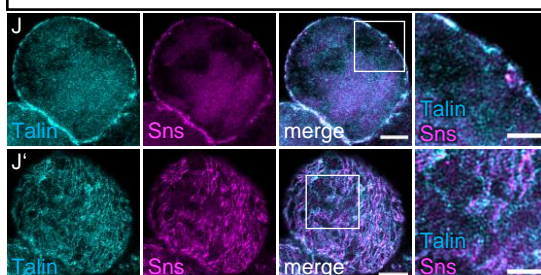

Supplement: 18_2022_4273_MOESM3_ESM.pdf [file 18_2022_4273_MOESM3_ESM.pdf]
